# Supplementary material
Source: publisher figshare collection journal article supplement (https://acs.figshare.com/ndownloader/files/17387795)
Supplement: Supplementary file 1 [file 17387795]

## **Supporting Information**

### **HRP@ZIF-8/DNA hybrids: Functionality Integration of ZIF-8 via Biomineralization and Surface Absorption**

Lei Wang<sup>a</sup>, Wenjing Zhi<sup>a</sup>, Dongsheng Lian<sup>a</sup>, Yu Wang<sup>a</sup>, Juan Han<sup>b</sup>, Yun Wang<sup>a,\*</sup>

<sup>a</sup> School of Chemistry and Chemical Engineering, Jiangsu University, 301 Xuefu Road, Zhenjiang 212013, Jiangsu Province, China

<sup>b</sup> School of Food and Biological Engineering, Jiangsu University, 301 Xuefu Road, Zhenjiang 212013, Jiangsu Province, China

\* Corresponding author: Yun Wang. E-mail: [yunwang86@ujs.edu.cn](mailto:yunwang86@ujs.edu.cn)

**Number of pages: 5**

**Number of figures: 7**

**Number of tables: 2**

## Characterization methods

Laser Confocal Microscope (LSCM) was used to determine the presence of fluorescent labelled HRP within HRP@ZIF-8. Fourier transform infrared (FTIR) was performed using a Nicolet Nexus 470 Spectrometer in the region of 400- 4000  $\text{cm}^{-1}$ . Thermal gravimetric analysis (TGA) measurements were performed on the STA449C Thermal Analyzer. Scanning electron microscope (SEM) was used to investigate the ZIF-8 and HRP@ZIF-8 morphology. Powder XRD patterns were collected using an X-ray diffractometer (XRD-6100Lab, Japan). The pore size of HRP@ZIF-8 bio-composite was determined by a BET measurement (TriStar II 3020). Fluorescence measurements were carried out using a Cary Eclipse spectrofluorometer (Varian, Australia).

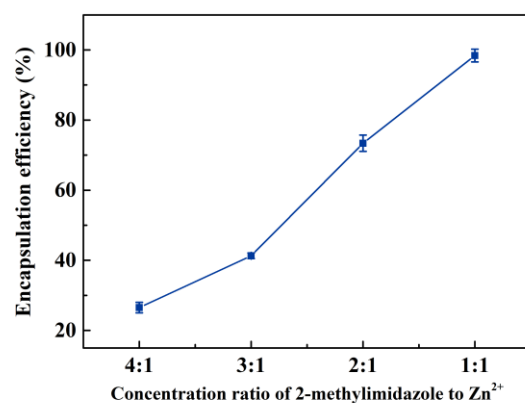

**Figure S1.** Effect of the concentration ratio of 2-methylimidazole to  $\text{Zn}^{2+}$  on encapsulation efficiency of HRP@ZIF-8. The error bars represent the standard deviations of triplicate experiments.

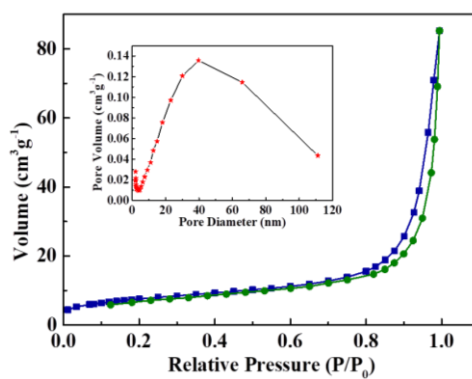

**Figure S2.**  $\text{N}_2$  adsorption-desorption curves and pore diameter distributions (inset) of ZIF-8.

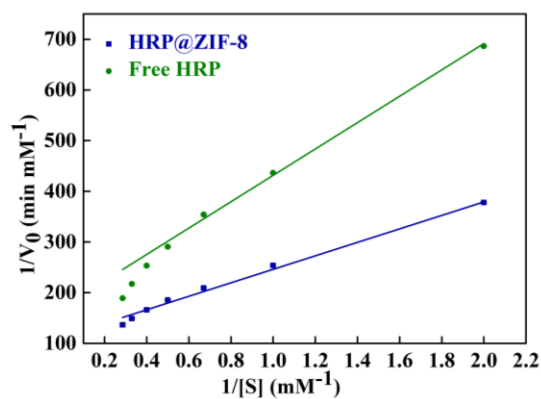

**Figure S3.** Lineweaver-Burk plots for determination of the kinetic parameters for free HRP and HRP@ZIF-8.

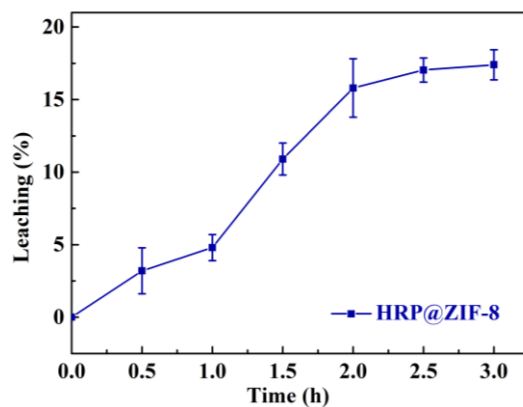

**Figure S4.** Enzyme leaching test of HRP@ZIF-8 after different incubation time at 60 °C.

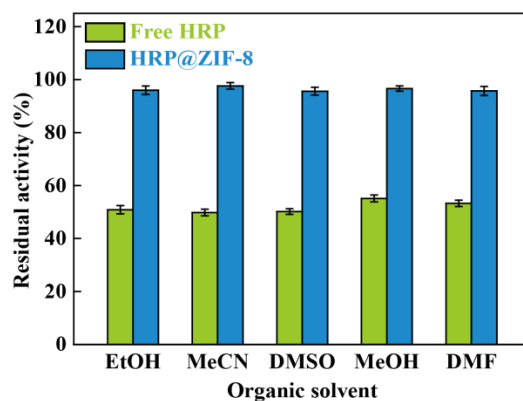

**Figure S5.** Effect of organic solvents on the relative activity of free HRP and HRP@ZIF-8. The error bars represent the standard deviations of triplicate experiments.

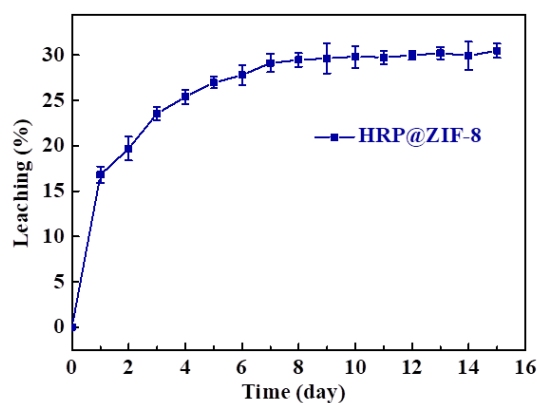

**Figure S6.** Enzyme leaching test of HRP@ZIF-8 after different incubation time at 4 °C.

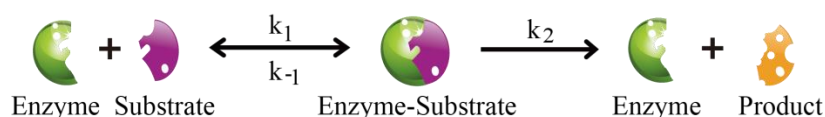

**Scheme S1.** Sequential reactions of the enzyme.

**Table S1.** The kinetic parameters of free HRP and HRP@ZIF-8.

| Kinetic parameters                                 | Free HRP | HRP@ZIF-8 |
|----------------------------------------------------|----------|-----------|
| $K_m$ (mM)                                         | 1.5207   | 1.1773    |
| $V_{\max}$ ( $\mu\text{M} \cdot \text{min}^{-1}$ ) | 5.8      | 8.9       |

**Table S2.** Comparison of immobilized enzyme for the detection of phenol.

| Immobilized enzyme                                             | Detection limit   | Solution                  | Reference                            |
|----------------------------------------------------------------|-------------------|---------------------------|--------------------------------------|
| HRP@<br>$\text{Cu}_3(\text{PO}_4)_2 \cdot 3\text{H}_2\text{O}$ | 1.0 $\mu\text{M}$ | 0.1 M PBS buffer (pH 7.4) | ACS Appl. Mater. Interfaces 2014 [1] |
| ZIF-8@BHb                                                      | 1.0 $\mu\text{M}$ | 0.1 M PBS buffer (pH 7.4) | ACS Appl. Mater. Interfaces 2016 [2] |

## References

- (1) Lin, Z.; Xiao, Y.; Yin, Y. Q.; Hu, W. L.; Liu, W.; Yang, H. H. Facile synthesis of enzyme-inorganic hybrid nanoflowers and its application as a colorimetric platform for visual detection of hydrogen peroxide and phenol. ACS Appl. Mater. Interfaces 2014, 6, 10775-10782, DOI: 10.1021/am502757e.
- (2) Yin, Y. Q.; Gao, C. L.; Xiao, Q.; Lin, G.; Lin, Z.; Cai, Z. W.; Yang, H. H. Protein-metal organic framework hybrid composites with intrinsic peroxidase-like activity as a colorimetric biosensing platform. ACS Appl. Mater. Interfaces 2016, 8, 29052-29061, DOI: 10.1021/acsami.6b09893.
